# Supplementary material
Source: PubMed Central journal article supplement (PMC3743271)
Supplement: jn.113.176826_nutrition176826SupplementaryData2.pdf [file jn.113.176826_nutrition176826SupplementaryData2.pdf]

## Online supporting material

### Supplemental Table 1: Recipes of the two sauces accompanying the pearl millet paste<sup>1</sup>

| Ingredients                                            | Leafy vegetable sauce <sup>2</sup><br>g/kg | Okra sauce <sup>3</sup> |
|--------------------------------------------------------|--------------------------------------------|-------------------------|
| African eggplant-leaves ( <i>Solanum macrocarpon</i> ) | 396                                        | 102                     |
| Okra ( <i>Abelmoschus esculentus</i> )                 | -                                          | 153                     |
| Mallow-leaves ( <i>Corchorus olitorius</i> )           | -                                          | 88                      |
| Tomato                                                 | 170                                        | -                       |
| Onion                                                  | 85                                         | 26                      |
| Red palm oil                                           | 71                                         | 31                      |
| Afitin <sup>4</sup>                                    | 57                                         | 29                      |
| Salt                                                   | 6                                          | 7                       |
| Green chili                                            | 6                                          | 4                       |
| Maggi Cube                                             | 6                                          | 4                       |
| Black pepper                                           | 1                                          | 1                       |
| Bicarbonate                                            | 1                                          | 3                       |
| Water                                                  | 202                                        | 551                     |

<sup>1</sup> Sauces were prepared freshly the day before administration and stored overnight in a refrigerator

<sup>2</sup> 110 g of leafy vegetable sauce accompanied the serving of pearl millet paste in the morning

<sup>3</sup> 80 g of okra sauce accompanied the serving of pearl millet paste at noon

<sup>4</sup> Fermented paste of African locust bean (*Parkia biglobosa*) (41)
